# Supplementary material for: Analysis of the Antibacterial Properties of Compound Essential Oil and the Main Antibacterial Components of Unilateral Essential Oils
Source: MDPI journal article supplement (doi:10.3390/molecules28176304), 2023-08-28
Supplement: s1 [file s1]

**Table S1. Chemical composition of Chinese cinnamon bark oil.**

| N<br>o | Retentio<br>n time | Molecula<br>r formula                          | Name of substance                                                       | Cas        | Matchin<br>g index | Conten<br>t (%) |
|--------|--------------------|------------------------------------------------|-------------------------------------------------------------------------|------------|--------------------|-----------------|
| 1      | 24.916             | C <sub>9</sub> H <sub>8</sub> O                | Cyclohexanol,5-methyl-2-(1-methylethenyl)-, (1a,2a,5b)-                 | 104-55-2   | 99.6               | 22.58           |
| 2      | 18.369             | C <sub>10</sub> H <sub>18</sub> O              | Cyclohexanol,5-methyl-2-(1-methylethenyl)-, (1a,2a,5b)-                 | 29141-10-4 | 98.8               | 0.31            |
| 3      | 10.434             | C <sub>10</sub> H <sub>18</sub>                | cis-Pinane                                                              | 6876-13-7  | 96.0               | 0.28            |
| 4      | 15.604             | C <sub>10</sub> H <sub>16</sub>                | Bicyclo[4.1.0]hept-2-ene,3,7,7-trimethyl-                               | 554-61-0   | 95.4               | 0.24            |
| 5      | 33.365             | C <sub>15</sub> H <sub>24</sub>                | (-)-g-Cadinene                                                          | 39029-41-9 | 98.4               | 0.26            |
| 6      | 41.338             | C <sub>16</sub> H <sub>30</sub> O <sub>3</sub> | Tridecanoic acid,2-oxiranylmethyl ester; Tridecanoicacid, 2,3-epoxyprop | 63978-73-4 | 89.0               | 0.31            |
| 7      | 22.780             | C <sub>10</sub> H <sub>16</sub> O              | 5-methyl-2-(1-methylethylidene)-Cyclohexanone                           | 15932-80-6 | 97.4               | 0.41            |
| 8      | 12.216             | C <sub>12</sub> H <sub>20</sub> O <sub>2</sub> | 2-Cyclohexen-1-ol,3-methyl-6-(1-methylethyl)-, 1-acetate                | 1204-30-4  | 92.1               | 0.34            |
| 9      | 11.363             | C <sub>10</sub> H <sub>18</sub>                | Cyclohexene,4-methyl-1-(1-methylethyl)-                                 | 500-00-5   | 92.9               | 0.58            |
| 10     | 20.651             | C <sub>10</sub> H <sub>20</sub> O              | DL-Menthol                                                              | 89-78-1    | 99.1               | 0.56            |
| 11     | 34.250             | C <sub>15</sub> H <sub>24</sub>                | α -muurolene                                                            | 10208-80-7 | 99.2               | 0.46            |
| 12     | 11.469             | C <sub>8</sub> H <sub>18</sub> O               | 3-Octanol                                                               | 589-98-0   | 94.9               | 0.40            |
| 13     | 11.636             | C <sub>10</sub> H <sub>18</sub>                | cis-m-Menth-8-ene                                                       | 24399-15-3 | 83.7               | 0.63            |
| 14     | 35.086             | C <sub>15</sub> H <sub>24</sub>                | d-Cadinene                                                              | 483-76-1   | 96.9               | 1.13            |

|    |        |                                                |                                                                                           |                |      |       |
|----|--------|------------------------------------------------|-------------------------------------------------------------------------------------------|----------------|------|-------|
| 15 | 25.557 | C <sub>12</sub> H <sub>22</sub> O <sub>2</sub> | 5-methyl-2-(1-methylethyl)<br>cyclohexanol acetate                                        | 16409<br>-45-3 | 99.0 | 0.93  |
| 16 | 11.122 | C <sub>10</sub> H <sub>16</sub>                | Myrcene                                                                                   | 123-<br>35-3   | 95.4 | 0.87  |
| 17 | 24.986 | C <sub>9</sub> H <sub>8</sub> O                | trans-Cinnamaldehyde                                                                      | 14371<br>-10-9 | 94.8 | 4.47  |
| 18 | 19.292 | C <sub>10</sub> H <sub>18</sub> O              | Cyclohexanone,5-methyl-2-(1-<br>methylethyl)-, (2R,5S)-rel-                               | 89-80-<br>5    | 96.9 | 2.23  |
| 19 | 8.517  | C <sub>10</sub> H <sub>16</sub>                | alpha-Pinene                                                                              | 80-56-<br>8    | 98.6 | 1.41  |
| 20 | 35.515 | C <sub>10</sub> H <sub>10</sub> O <sub>2</sub> | 2'-Methoxycinnamaldehyde                                                                  | 1504-<br>74-1  | 99.1 | 2.51  |
| 21 | 29.374 | C <sub>15</sub> H <sub>24</sub>                | Tricyclo[4.4.0.0.2,7]dec-3-<br>ene,1,3-dimethyl-8-(1-<br>methylethyl)-, (1R,2S,6S,7S,8S)- | 3856-<br>25-5  | 98.2 | 3.67  |
| 22 | 18.834 | C <sub>10</sub> H <sub>18</sub> O              | 5-methyl-2-(1-methylethyl)-,<br>(2S-trans)-Cyclohexanone                                  | 14073<br>-97-3 | 98.7 | 2.97  |
| 23 | 13.016 | C <sub>10</sub> H <sub>16</sub>                | Cyclohexene,1-methyl-4-(1-<br>methylethenyl)-, (4R)-                                      | 5989-<br>27-5  | 96.1 | 8.90  |
| 24 | 10.358 | C <sub>10</sub> H <sub>16</sub>                | beta-Pinene                                                                               | 127-<br>91-3   | 97.4 | 2.40  |
| 25 | 12.016 | C <sub>10</sub> H <sub>16</sub>                | Tricyclo[2.2.1.0.2,6]heptane,1,3,<br>3-trimethyl-                                         | 488-<br>97-1   | 97.5 | 6.45  |
| 26 | 15.416 | C <sub>7</sub> H <sub>12</sub> O <sub>4</sub>  | Diethyl malonate                                                                          | 105-<br>53-3   | 98.5 | 6.07  |
| 27 | 20.251 | C <sub>10</sub> H <sub>20</sub> O              | DL-Menthol                                                                                | 1490-<br>04-6  | 99.1 | 19.78 |
| 28 | 12.810 | C <sub>10</sub> H <sub>14</sub>                | 1-methyl-3-(1-methylethyl)-<br>benzen                                                     | 535-<br>77-3   | 91.3 | 8.85  |

**Table S2. Chemical composition of oregano essential oil.**

| N<br>o | Retentio<br>n time | Molecula<br>r formula                          | Name of substance                                             | Cas            | Matchin<br>g index | Conten<br>t (%) |
|--------|--------------------|------------------------------------------------|---------------------------------------------------------------|----------------|--------------------|-----------------|
| 1      | 11.826             | C <sub>10</sub> H <sub>16</sub>                | Tricyclo[2.2.1.0 <sup>2,6</sup> ]heptane,1,3,<br>3-trimethyl- | 488-<br>97-1   | 99                 | 0.61            |
| 2      | 12.532             | C <sub>10</sub> H <sub>14</sub>                | 1-isopropyl-2-methylbenzene                                   | 527-<br>84-4   | 99                 | 1.25            |
| 3      | 12.708             | C <sub>10</sub> H <sub>16</sub>                | Cyclohexene,1-methyl-5-(1-<br>methylethenyl)-, (5R)-          | 1461-<br>27-4  | 97                 | 0.74            |
| 4      | 14.419             | C <sub>7</sub> H <sub>8</sub> O                | o-Cresol                                                      | 95-48-<br>7    | 99                 | 12.62           |
| 5      | 19.643             | C <sub>10</sub> H <sub>20</sub> O              | Menthol                                                       | 15356<br>-70-4 | 99                 | 0.30            |
| 6      | 23.011             | C <sub>10</sub> H <sub>14</sub> O              | Thymol                                                        | 89-83-<br>8    | 96                 | 17.12           |
| 7      | 23.086             | C <sub>9</sub> H <sub>12</sub> O               | 3-(1-methylethyl)-Phenol                                      | 618-<br>45-1   | 88                 | 1.41            |
| 8      | 27.350             | C <sub>10</sub> H <sub>14</sub> O              | o-Cymen-5-ol                                                  | 3228-<br>02-2  | 97                 | 30.54           |
| 9      | 29.406             | C <sub>11</sub> H <sub>16</sub> O              | Benzene,1-methoxy-4-methyl-<br>2-(1-methylethyl)-             | 31574<br>-44-4 | 93                 | 0.85            |
| 10     | 34.444             | C <sub>13</sub> H <sub>20</sub> O              | 2,4-Diisopropyl-5-<br>methylphenol                            | 40625<br>-96-5 | 97                 | 28.22           |
| 11     | 38.867             | C <sub>16</sub> H <sub>26</sub> O              | 2,6-Ditert-butyl-4-ethylphenol                                | 4130-<br>42-1  | 91                 | 1.70            |
| 12     | 47.729             | C <sub>16</sub> H <sub>32</sub> O <sub>2</sub> | Palmitic acid                                                 | 57-10-<br>3    | 99                 | 0.41            |
| 13     | 52.031             | C <sub>18</sub> H <sub>32</sub> O <sub>2</sub> | Conjugated linoleic acid                                      | 2420-<br>56-6  | 84                 | 2.59            |
| 14     | 55.283             | C <sub>19</sub> H <sub>36</sub> O <sub>3</sub> | Hexadecanoic acid,2-<br>oxiranylmethyl ester                  | 7501-<br>44-2  | 96                 | 0.23            |

|    |        |                                                |                                                                                    |               |    |      |
|----|--------|------------------------------------------------|------------------------------------------------------------------------------------|---------------|----|------|
| 15 | 57.771 | C <sub>21</sub> H <sub>38</sub> O <sub>4</sub> | 9,12-Octadecadienoic acid<br>(9Z,12Z)-, 2-hydroxy-1-<br>(hydroxymethyl)ethyl ester | 3443-<br>82-1 | 84 | 0.68 |
| 16 | 57.825 | C <sub>21</sub> H <sub>38</sub> O <sub>3</sub> | 9-Octadecenoic acid(9Z)-, 2-<br>oxiranylmethyl ester                               | 5431-<br>33-4 | 95 | 0.58 |
| 17 | 60.037 | C <sub>21</sub> H <sub>38</sub> O <sub>4</sub> | 9,12-Octadecadienoic acid<br>(9Z,12Z)-,2-hydroxy-1-<br>(hydroxymethyl)ethyl ester  | 3443-<br>82-1 | 91 | 0.16 |
